# Supplementary material for: Size-confined growth of atom-precise nanoclusters in metal–organic frameworks and their catalytic applications
Source: Royal Society of Chemistry journal article supplement (doi:10.1039/c5nr06930k), 2015-12-16
Supplement: c5nr06930k1.pdf [file c5nr06930k1.pdf]

## Supporting Information

# Size-Confined Growth of Atom-Precise Nanoclusters in Metal-Organic Frameworks and Catalytic Application

Lingli Liu<sup>a,b</sup>, Yongbo Song<sup>a</sup>, Hanbao Chong<sup>a</sup>, Sha Yang<sup>a</sup>, Ji Xiang<sup>a</sup>, Shan Jin<sup>a</sup>, Xi Kang<sup>a</sup>, Jun Zhang<sup>a</sup>, Haizhu Yu<sup>a</sup>, Manzhou Zhu<sup>a\*</sup>

<sup>a</sup>Department of Chemistry and Center for Atomic Engineering of Advanced Materials, Anhui University, Hefei, Anhui 230601, P. R. China

<sup>b</sup>Laboratory of Fundamental Chemistry, School of Pharmacy, Anhui Xinhua University, Hefei, Anhui, 230088, P.R. China

### 1. Preparation of $[\text{Au}_{13}\text{Ag}_{12}(\text{PPh}_3)_{10}\text{Cl}_8]^+$ NCs and $\text{Au}_{13}\text{Ag}_{12}:\text{PPh}_3 @ \text{MIL-101}(\text{Cr})$

The composite of  $\text{Au}_{13}\text{Ag}_{12}:\text{PPh}_3 @ \text{MIL-101}(\text{Cr})$  was synthesized as follows:  $\text{HAuCl}_4 \cdot 3\text{H}_2\text{O}$  (78.8 mg, 0.2 mmol) was added to ethanol solution (10 mL) of evacuated MIL-101(Cr) (100 mg) and  $\text{AgNO}_3$  (20mg dissolved in 5mL ethanol) was added at room temperature, and the mixture was kept under constant, slow stirring for several hours. Then 160 mg triphenylphosphine ( $\text{PPh}_3$ ) was added to the above mixed suspension. Then an aqueous solution of  $\text{NaBH}_4$  (40mg dissolved in 5mL ethanol) was quickly added to the above solution to initiate the reaction. The reaction was allowed to proceed for 2 hours. The composite of  $\text{AuAg}:\text{PPh}_3 @ \text{MIL-101}(\text{Cr})$  was collected by centrifugation, and the precipitation and supernatant were separated. The  $[\text{Au}_{13}\text{Ag}_{12}(\text{PPh}_3)_{10}\text{Cl}_8]^+$  NCs crude product was prepared by dissolving in methylene chloride. After that, the methylene chloride solution of  $[\text{Au}_{13}\text{Ag}_{12}(\text{PPh}_3)_{10}\text{Cl}_8]^+$  NCs was dried via rotavaporation. N-hexane (~20 mL) was added to remove the redundant  $\text{PPh}_3$  and this wash/centrifugation cycle was repeated at least three times. Then 10 mL ethanol was used to extract pure  $\text{Au}_{13}\text{Ag}_{12}:\text{PPh}_3$  NCs and about 8.5% yield was synthesized.

The precipitation was washed several times with ethanol until the ethanol solution is colorless so as to remove the product on the surface,  $\text{Au}_{13}\text{Ag}_{12}:\text{PPh}_3 @ \text{MIL-101}(\text{Cr})$  was vacuum dried overnight at 40°C.

### 2. Table S1. Physicochemical structural properties of ZIF-8-supported Au clusters.

| Samples                                      | BET surface area<br>( $\text{m}^2\text{g}^{-1}$ ) | Pore volume<br>( $\text{cm}^3\text{g}^{-1}$ ) | Pore diameter<br>(nm) |
|----------------------------------------------|---------------------------------------------------|-----------------------------------------------|-----------------------|
| ZIF-8                                        | 1337.82                                           | 0.80                                          | 2.39                  |
| $\text{Au}_{11}:\text{PPh}_3 @ \text{ZIF-8}$ | 797.56                                            | 0.39                                          | 1.41                  |
| $\text{Au}_{11} @ \text{ZIF-8}(150)$         | 555.40                                            | 0.38                                          | 1.97                  |
| $\text{Au}_{11} @ \text{ZIF-8}(200)$         | 596.52                                            | 0.21                                          | 1.52                  |
| $\text{Au}_{11} @ \text{ZIF-8}(300)$         | 169.5                                             | 0.11                                          | 1.93                  |

**Table S2. Physicochemical structural properties of MIL-101(Cr)-supported AuAg clusters.**

| Samples                                                      | BET surface area<br>(m <sup>2</sup> g <sup>-1</sup> ) | Pore volume<br>(cm <sup>3</sup> g <sup>-1</sup> ) | Pore diameter<br>(nm) |
|--------------------------------------------------------------|-------------------------------------------------------|---------------------------------------------------|-----------------------|
| MIL-101(Cr)                                                  | 1301.11                                               | 0.71                                              | 2.43                  |
| Au <sub>13</sub> Ag <sub>12</sub> :PPh <sub>3</sub> @MIL-101 | 548.15                                                | 0.33                                              | 2.19                  |
| Au <sub>13</sub> Ag <sub>12</sub> @ MIL-101(Cr)              | 773.39                                                | 0.46                                              | 2.41                  |

**3. X-ray Crystallographic Determination.****Table S2. Crystal data and structure refinement for [Au<sub>13</sub>Ag<sub>12</sub>(PPh<sub>3</sub>)<sub>10</sub>Cl<sub>8</sub>]<sup>+</sup>**

|                                        |                                                                                                                 |
|----------------------------------------|-----------------------------------------------------------------------------------------------------------------|
| <b>Identification code</b>             | [Au <sub>13</sub> Ag <sub>12</sub> (PPh <sub>3</sub> ) <sub>10</sub> Cl <sub>8</sub> ] <sup>+</sup>             |
| <b>Empirical formula</b>               | C <sub>180</sub> H <sub>150</sub> Ag <sub>12</sub> Au <sub>13</sub> Cl <sub>8</sub> P <sub>10</sub>             |
| <b>Formula weight</b>                  | 6761.30                                                                                                         |
| <b>Temperature</b>                     | 296(2) K                                                                                                        |
| <b>Wavelength</b>                      | 0.71073 Å                                                                                                       |
| <b>Crystal system, space group</b>     | Monoclinic C2/c                                                                                                 |
| <b>Unit cell dimensions</b>            | a = 47.6239(19) Å    α = 90 deg.<br>b = 16.6379(7) Å    β = 127.438(2) deg.<br>c = 36.1489(13) Å    γ = 90 deg. |
| <b>Volume</b>                          | 22742.9(16) Å <sup>3</sup>                                                                                      |
| <b>Z, Calculated density</b>           | 4, 1.975 Mg/m <sup>3</sup>                                                                                      |
| <b>Absorption coefficient</b>          | 9.556 mm <sup>-1</sup>                                                                                          |
| <b>F(000)</b>                          | 12428                                                                                                           |
| <b>Crystal size</b>                    | 0.19 x 0.16 x 0.15 mm                                                                                           |
| <b>Theta range for data collection</b> | 1.34 to 25.50 deg.                                                                                              |
| <b>Limiting indices</b>                | -57 ≤ h ≤ 52, -20 ≤ k ≤ 20, -43 ≤ l ≤ 43                                                                        |

|                                   |                                             |
|-----------------------------------|---------------------------------------------|
| Reflections collected / unique    | 84995 / 21168 [R(int) = 0.0726]             |
| Completeness to theta = 25.50     | 99.9 %                                      |
| Absorption correction             | None                                        |
| Max. and min. transmission        | 0.3282 and 0.2640                           |
| Refinement method                 | Full-matrix least-squares on F <sup>2</sup> |
| Data / restraints / parameters    | 21168 / 0 / 783                             |
| Goodness-of-fit on F <sup>2</sup> | 0.981                                       |
| Final R indices [I>2sigma(I)]     | R1 = 0.0540, wR2 = 0.1475                   |
| R indices (all data)              | R1 = 0.0896, wR2 = 0.1592                   |
| Largest diff. peak and hole       | 3.185 and -5.186 e. Å <sup>-3</sup>         |

Table S3. Atomic coordinates (x 10<sup>4</sup>) and equivalent isotropic displacement parameters (Å<sup>2</sup> x 10<sup>3</sup>) for [Au<sub>13</sub>Ag<sub>12</sub>(PPh<sub>3</sub>)<sub>10</sub>Cl<sub>8</sub>]<sup>+</sup>. U(eq) is defined as one third of the trace of the orthogonalized U<sup>ij</sup> tensor.

|       | x       | y       | z       | U(eq) |
|-------|---------|---------|---------|-------|
| Ag(1) | 1025(1) | 2513(1) | 2292(1) | 50(1) |
| Ag(2) | 85(1)   | 3736(1) | 2141(1) | 50(1) |
| Ag(3) | -178(1) | 2263(1) | 1596(1) | 47(1) |
| Ag(4) | 176(1)  | 913(1)  | 2232(1) | 56(1) |
| Ag(5) | 641(1)  | 1541(1) | 3161(1) | 55(1) |
| Ag(6) | 600(1)  | 3299(1) | 3131(1) | 55(1) |
| Au(1) | 812(1)  | 3877(1) | 2588(1) | 52(1) |
| Au(2) | 331(1)  | 3254(1) | 1637(1) | 44(1) |
| Au(3) | 389(1)  | 1519(1) | 1693(1) | 45(1) |
| Au(4) | 915(1)  | 1081(1) | 2660(1) | 50(1) |
| Au(5) | 1149(1) | 2516(1) | 3208(1) | 49(1) |
| Au(6) | 516(1)  | 2409(1) | 2395(1) | 36(1) |
| Au(7) | 0       | 2325(1) | 2500    | 70(1) |
| C(1)  | 752(2)  | 5948(4) | 2570(2) | 78(5) |

|       |         |         |         |         |
|-------|---------|---------|---------|---------|
| C(2)  | 394(2)  | 5767(5) | 2307(2) | 90(5)   |
| C(3)  | 151(2)  | 6370(6) | 2192(3) | 88(5)   |
| C(4)  | 266(2)  | 7154(6) | 2340(3) | 91(6)   |
| C(5)  | 624(2)  | 7336(4) | 2602(3) | 94(6)   |
| C(6)  | 867(2)  | 6733(4) | 2717(2) | 89(5)   |
| C(7)  | 1213(2) | 5315(5) | 2401(2) | 126(8)  |
| C(8)  | 1267(2) | 6086(5) | 2308(2) | 136(9)  |
| C(9)  | 1396(2) | 6193(7) | 2054(3) | 141(9)  |
| C(10) | 1470(2) | 5530(8) | 1894(3) | 141(9)  |
| C(11) | 1416(2) | 4758(8) | 1987(3) | 136(9)  |
| C(12) | 1288(2) | 4651(6) | 2240(3) | 129(8)  |
| C(13) | 1402(2) | 5321(4) | 3315(2) | 112(7)  |
| C(14) | 1316(2) | 5556(4) | 3604(2) | 136(9)  |
| C(15) | 1581(2) | 5769(5) | 4064(2) | 147(10) |
| C(16) | 1933(2) | 5746(6) | 4235(2) | 149(10) |
| C(17) | 2020(2) | 5511(6) | 3946(2) | 151(10) |
| C(18) | 1754(2) | 5299(4) | 3487(2) | 144(9)  |
| C(19) | 300(3)  | 4986(5) | 1080(4) | 70(4)   |
| C(20) | 502(3)  | 5324(7) | 962(4)  | 79(5)   |
| C(21) | 557(3)  | 6150(7) | 995(4)  | 89(5)   |
| C(22) | 409(3)  | 6638(5) | 1148(4) | 93(6)   |
| C(23) | 206(3)  | 6300(7) | 1266(4) | 90(6)   |
| C(24) | 152(3)  | 5474(7) | 1233(4) | 84(5)   |
| C(25) | -275(2) | 4035(7) | 532(3)  | 72(4)   |
| C(26) | -399(3) | 4557(6) | 162(4)  | 77(5)   |
| C(27) | -761(3) | 4635(6) | -187(3) | 90(5)   |
| C(28) | -998(2) | 4191(7) | -166(4) | 93(6)   |
| C(29) | -873(3) | 3668(7) | 205(4)  | 91(6)   |
| C(30) | -512(3) | 3591(6) | 553(3)  | 78(5)   |
| C(31) | 375(3)  | 3557(6) | 751(4)  | 68(4)   |
| C(32) | 221(2)  | 3571(6) | 279(4)  | 74(5)   |
| C(33) | 407(3)  | 3281(7) | 124(3)  | 83(5)   |
| C(34) | 747(3)  | 2978(7) | 442(5)  | 91(6)   |
| C(35) | 901(2)  | 2964(7) | 914(4)  | 93(6)   |
| C(36) | 715(3)  | 3253(7) | 1069(3) | 85(5)   |
| C(37) | 599(3)  | 642(7)  | 1051(4) | 80(5)   |
| C(38) | 574(3)  | 132(7)  | 728(4)  | 92(6)   |
| C(39) | 859(3)  | 50(7)   | 717(4)  | 98(6)   |
| C(40) | 1169(3) | 479(8)  | 1028(5) | 100(6)  |
| C(41) | 1194(3) | 989(7)  | 1351(4) | 101(6)  |
| C(42) | 909(3)  | 1070(6) | 1363(4) | 93(6)   |
| C(43) | -64(2)  | 1312(4) | 529(2)  | 73(5)   |
| C(44) | -15(3)  | 1555(4) | 204(3)  | 81(5)   |
| C(45) | -288(3) | 1933(4) | -205(3) | 92(6)   |

|       |         |           |         |         |
|-------|---------|-----------|---------|---------|
| C(46) | -610(3) | 2069(4)   | -288(3) | 98(6)   |
| C(47) | -659(2) | 1826(4)   | 37(3)   | 100(6)  |
| C(48) | -386(2) | 1448(3)   | 446(3)  | 89(5)   |
| C(49) | 46(2)   | -160(4)   | 997(3)  | 82(5)   |
| C(50) | -155(2) | -528(3)   | 562(3)  | 99(6)   |
| C(51) | -321(3) | -1258(3)  | 501(4)  | 108(7)  |
| C(52) | -285(3) | -1620(4)  | 874(4)  | 118(7)  |
| C(53) | -84(3)  | -1252(5)  | 1308(4) | 124(8)  |
| C(54) | 82(3)   | -522(5)   | 1370(3) | 109(7)  |
| C(55) | 1293(4) | -717(10)  | 3261(5) | 114(7)  |
| C(56) | 1479(4) | -1434(12) | 3377(6) | 124(8)  |
| C(57) | 1485(4) | -1976(8)  | 3675(6) | 133(9)  |
| C(58) | 1305(5) | -1799(10) | 3856(5) | 138(9)  |
| C(59) | 1119(4) | -1082(12) | 3740(6) | 133(8)  |
| C(60) | 1113(4) | -541(8)   | 3442(6) | 121(8)  |
| C(61) | 1733(1) | 369(2)    | 3200(1) | 96(6)   |
| C(62) | 2026(2) | -60(2)    | 3556(2) | 111(7)  |
| C(63) | 2364(1) | 184(3)    | 3725(2) | 114(7)  |
| C(64) | 2409(2) | 857(3)    | 3538(2) | 114(7)  |
| C(65) | 2116(2) | 1286(3)   | 3182(2) | 113(7)  |
| C(66) | 1778(2) | 1042(3)   | 3013(2) | 108(7)  |
| C(67) | 1197(2) | -564(3)   | 2408(2) | 130(8)  |
| C(68) | 912(2)  | -1087(4)  | 2208(2) | 143(9)  |
| C(69) | 822(2)  | -1577(4)  | 1839(2) | 149(10) |
| C(70) | 1017(2) | -1544(4)  | 1669(2) | 148(10) |
| C(71) | 1302(2) | -1021(4)  | 1869(2) | 145(10) |
| C(72) | 1392(2) | -531(3)   | 2238(2) | 144(9)  |
| C(74) | 1838(1) | 1626(2)   | 4164(1) | 81(5)   |
| C(75) | 2179(1) | 1381(2)   | 4345(1) | 86(5)   |
| C(76) | 2310(2) | 659(3)    | 4586(1) | 98(6)   |
| C(77) | 2101(2) | 181(3)    | 4646(2) | 102(6)  |
| C(78) | 1760(2) | 426(3)    | 4465(2) | 102(6)  |
| C(79) | 1629(2) | 1148(3)   | 4224(2) | 94(6)   |
| C(80) | 1690(1) | 3149(3)   | 4349(2) | 72(4)   |
| C(81) | 1912(2) | 2954(3)   | 4820(2) | 90(5)   |
| C(82) | 1902(2) | 3405(3)   | 5135(2) | 96(6)   |
| C(83) | 1671(2) | 4052(4)   | 4980(3) | 97(6)   |
| C(84) | 1450(2) | 4247(3)   | 4509(3) | 96(6)   |
| C(85) | 1459(2) | 3796(3)   | 4194(2) | 83(5)   |
| C(86) | 1995(1) | 3062(2)   | 3889(2) | 77(5)   |
| C(87) | 2306(1) | 3372(2)   | 4286(2) | 87(5)   |
| C(88) | 2557(2) | 3719(3)   | 4256(2) | 93(6)   |
| C(89) | 2498(2) | 3755(3)   | 3830(3) | 100(6)  |
| C(90) | 2187(2) | 3444(3)   | 3433(2) | 96(6)   |

|       |         |         |         |        |
|-------|---------|---------|---------|--------|
| C(91) | 1936(2) | 3097(2) | 3463(2) | 86(5)  |
| Cl(1) | 1470(1) | 2605(3) | 2206(2) | 78(1)  |
| Cl(2) | -428(1) | 4594(2) | 1703(2) | 90(2)  |
| Cl(3) | -801(1) | 2374(4) | 1059(2) | 122(2) |
| Cl(4) | 459(2)  | 400(5)  | 3418(3) | 205(4) |
| P(1)  | 1043(1) | 5141(2) | 2714(2) | 67(1)  |
| P(2)  | 180(1)  | 3964(2) | 992(1)  | 50(1)  |
| P(3)  | 250(1)  | 797(2)  | 1065(1) | 54(1)  |
| P(4)  | 1291(1) | 33(2)   | 2893(1) | 63(1)  |
| P(5)  | 1679(1) | 2589(2) | 3916(1) | 59(1)  |

Table S4. Bond lengths [Å] and angles [deg] for  $[\text{Au}_{13}\text{Ag}_{12}(\text{PPh}_3)_{10}\text{Cl}_8]^+$ .

|               |            |
|---------------|------------|
| Ag(1)-Cl(1)   | 2.326(4)   |
| Ag(1)-Au(6)   | 2.6738(11) |
| Ag(1)-Au(2)   | 2.9216(12) |
| Ag(1)-Au(4)   | 2.9291(12) |
| Ag(1)-Au(3)   | 2.9371(11) |
| Ag(1)-Au(1)   | 2.9405(11) |
| Ag(1)-Au(5)   | 2.9920(12) |
| Ag(2)-Cl(2)   | 2.412(4)   |
| Ag(2)-Au(6)   | 2.7629(11) |
| Ag(2)-Au(1)   | 2.8010(11) |
| Ag(2)-Au(2)   | 2.8171(11) |
| Ag(2)-Au(7)   | 2.8280(13) |
| Ag(2)-Ag(6)#1 | 2.8703(15) |
| Ag(2)-Ag(3)   | 2.9098(14) |
| Ag(2)-Ag(6)   | 2.9447(15) |
| Ag(2)-Ag(2)#1 | 3.154(2)   |
| Ag(3)-Cl(3)   | 2.366(5)   |
| Ag(3)-Au(6)   | 2.7769(10) |
| Ag(3)-Au(3)   | 2.7892(11) |
| Ag(3)-Au(7)   | 2.8368(10) |
| Ag(3)-Au(2)   | 2.8603(11) |
| Ag(3)-Ag(4)   | 2.9074(14) |
| Ag(3)-Ag(5)#1 | 3.0752(15) |
| Ag(3)-Ag(6)#1 | 3.2257(15) |
| Ag(4)-Cl(4)#1 | 2.599(7)   |
| Ag(4)-Au(6)   | 2.8277(11) |
| Ag(4)-Au(7)   | 2.8557(14) |
| Ag(4)-Au(4)   | 2.8666(12) |
| Ag(4)-Ag(5)   | 2.8686(15) |

|                      |                   |
|----------------------|-------------------|
| <b>Ag(4)-Au(3)</b>   | <b>2.8687(12)</b> |
| <b>Ag(4)-Ag(4)#1</b> | <b>3.248(2)</b>   |
| <b>Ag(5)-Cl(4)</b>   | <b>2.490(6)</b>   |
| <b>Ag(5)-Cl(3)#1</b> | <b>2.802(5)</b>   |
| <b>Ag(5)-Au(7)</b>   | <b>2.8049(11)</b> |
| <b>Ag(5)-Au(5)</b>   | <b>2.8285(12)</b> |
| <b>Ag(5)-Au(6)</b>   | <b>2.8454(11)</b> |
| <b>Ag(5)-Au(4)</b>   | <b>2.9010(12)</b> |
| <b>Ag(5)-Ag(6)</b>   | <b>2.9300(16)</b> |
| <b>Ag(5)-Ag(3)#1</b> | <b>3.0756(15)</b> |
| <b>Ag(6)-Cl(2)#1</b> | <b>2.504(4)</b>   |
| <b>Ag(6)-Au(5)</b>   | <b>2.7805(12)</b> |
| <b>Ag(6)-Au(7)</b>   | <b>2.8400(11)</b> |
| <b>Ag(6)-Au(6)</b>   | <b>2.8531(11)</b> |
| <b>Ag(6)-Au(1)</b>   | <b>2.8652(12)</b> |
| <b>Ag(6)-Ag(2)#1</b> | <b>2.8705(15)</b> |
| <b>Ag(6)-Cl(3)#1</b> | <b>2.907(5)</b>   |
| <b>Ag(6)-Ag(3)#1</b> | <b>3.2260(15)</b> |
| <b>Au(1)-P(1)</b>    | <b>2.287(4)</b>   |
| <b>Au(1)-Au(6)</b>   | <b>2.6911(7)</b>  |
| <b>Au(1)-Au(5)</b>   | <b>2.8910(8)</b>  |
| <b>Au(1)-Au(2)</b>   | <b>2.9267(7)</b>  |
| <b>Au(2)-P(2)</b>    | <b>2.302(3)</b>   |
| <b>Au(2)-Au(6)</b>   | <b>2.7072(7)</b>  |
| <b>Au(2)-Au(3)</b>   | <b>2.8955(7)</b>  |
| <b>Au(3)-P(3)</b>    | <b>2.282(3)</b>   |
| <b>Au(3)-Au(6)</b>   | <b>2.6705(6)</b>  |
| <b>Au(3)-Au(4)</b>   | <b>2.8954(7)</b>  |
| <b>Au(4)-P(4)</b>    | <b>2.264(4)</b>   |
| <b>Au(4)-Au(6)</b>   | <b>2.6830(7)</b>  |
| <b>Au(4)-Au(5)</b>   | <b>2.8614(7)</b>  |
| <b>Au(5)-P(5)</b>    | <b>2.254(4)</b>   |
| <b>Au(5)-Au(6)</b>   | <b>2.6448(7)</b>  |
| <b>Au(6)-Au(7)</b>   | <b>2.7082(5)</b>  |
| <b>Au(7)-Au(6)#1</b> | <b>2.7081(5)</b>  |
| <b>Au(7)-Ag(5)#1</b> | <b>2.8048(11)</b> |
| <b>Au(7)-Ag(2)#1</b> | <b>2.8281(13)</b> |
| <b>Au(7)-Ag(3)#1</b> | <b>2.8370(10)</b> |
| <b>Au(7)-Ag(6)#1</b> | <b>2.8400(11)</b> |
| <b>Au(7)-Ag(4)#1</b> | <b>2.8557(14)</b> |
| <b>C(1)-C(2)</b>     | <b>1.3900</b>     |
| <b>C(1)-C(6)</b>     | <b>1.3900</b>     |
| <b>C(1)-P(1)</b>     | <b>1.767(8)</b>   |
| <b>C(2)-C(3)</b>     | <b>1.3900</b>     |

|             |          |
|-------------|----------|
| C(3)-C(4)   | 1.3900   |
| C(4)-C(5)   | 1.3900   |
| C(5)-C(6)   | 1.3900   |
| C(7)-C(12)  | 1.3900   |
| C(7)-C(8)   | 1.3900   |
| C(7)-P(1)   | 1.769(8) |
| C(8)-C(9)   | 1.3900   |
| C(9)-C(10)  | 1.3900   |
| C(10)-C(11) | 1.3900   |
| C(11)-C(12) | 1.3900   |
| C(13)-C(14) | 1.3899   |
| C(13)-C(18) | 1.3902   |
| C(13)-P(1)  | 1.795(7) |
| C(14)-C(15) | 1.3900   |
| C(15)-C(16) | 1.3899   |
| C(16)-C(17) | 1.3901   |
| C(17)-C(18) | 1.3900   |
| C(19)-C(20) | 1.3900   |
| C(19)-C(24) | 1.3900   |
| C(19)-P(2)  | 1.761(8) |
| C(20)-C(21) | 1.3900   |
| C(21)-C(22) | 1.3900   |
| C(22)-C(23) | 1.3900   |
| C(23)-C(24) | 1.3900   |
| C(25)-C(26) | 1.3900   |
| C(25)-C(30) | 1.3900   |
| C(25)-P(2)  | 1.757(9) |
| C(26)-C(27) | 1.3900   |
| C(27)-C(28) | 1.3900   |
| C(28)-C(29) | 1.3900   |
| C(29)-C(30) | 1.3900   |
| C(31)-C(32) | 1.3900   |
| C(31)-C(36) | 1.3900   |
| C(31)-P(2)  | 1.752(9) |
| C(32)-C(33) | 1.3900   |
| C(33)-C(34) | 1.3900   |
| C(34)-C(35) | 1.3900   |
| C(35)-C(36) | 1.3900   |
| C(37)-C(38) | 1.3900   |
| C(37)-C(42) | 1.3900   |
| C(37)-P(3)  | 1.712(9) |
| C(38)-C(39) | 1.3900   |
| C(39)-C(40) | 1.3900   |
| C(40)-C(41) | 1.3900   |

|             |           |
|-------------|-----------|
| C(41)-C(42) | 1.3900    |
| C(43)-C(44) | 1.3900    |
| C(43)-C(48) | 1.3900    |
| C(43)-P(3)  | 1.789(8)  |
| C(44)-C(45) | 1.3900    |
| C(45)-C(46) | 1.3900    |
| C(46)-C(47) | 1.3900    |
| C(47)-C(48) | 1.3900    |
| C(49)-C(50) | 1.3900    |
| C(49)-C(54) | 1.3901    |
| C(49)-P(3)  | 1.802(8)  |
| C(50)-C(51) | 1.3901    |
| C(51)-C(52) | 1.3900    |
| C(52)-C(53) | 1.3900    |
| C(53)-C(54) | 1.3900    |
| C(55)-C(56) | 1.3900    |
| C(55)-C(60) | 1.3900    |
| C(55)-P(4)  | 1.819(12) |
| C(56)-C(57) | 1.3900    |
| C(57)-C(58) | 1.3900    |
| C(58)-C(59) | 1.3900    |
| C(59)-C(60) | 1.3900    |
| C(61)-C(62) | 1.3900    |
| C(61)-C(66) | 1.3900    |
| C(61)-P(4)  | 1.772(7)  |
| C(62)-C(63) | 1.3900    |
| C(63)-C(64) | 1.3900    |
| C(64)-C(65) | 1.3900    |
| C(65)-C(66) | 1.3900    |
| C(67)-C(68) | 1.3899    |
| C(67)-C(72) | 1.3901    |
| C(67)-P(4)  | 1.819(6)  |
| C(68)-C(69) | 1.3900    |
| C(69)-C(70) | 1.3899    |
| C(70)-C(71) | 1.3900    |
| C(71)-C(72) | 1.3900    |
| C(74)-C(75) | 1.3899    |
| C(74)-C(79) | 1.3901    |
| C(74)-P(5)  | 1.765(6)  |
| C(75)-C(76) | 1.3900    |
| C(76)-C(77) | 1.3900    |
| C(77)-C(78) | 1.3900    |
| C(78)-C(79) | 1.3900    |
| C(80)-C(81) | 1.3900    |

|                   |            |
|-------------------|------------|
| C(80)-C(85)       | 1.3900     |
| C(80)-P(5)        | 1.793(5)   |
| C(81)-C(82)       | 1.3900     |
| C(82)-C(83)       | 1.3900     |
| C(83)-C(84)       | 1.3900     |
| C(84)-C(85)       | 1.3900     |
| C(86)-C(87)       | 1.3900     |
| C(86)-C(91)       | 1.3901     |
| C(86)-P(5)        | 1.754(6)   |
| C(87)-C(88)       | 1.3900     |
| C(88)-C(89)       | 1.3899     |
| C(89)-C(90)       | 1.3900     |
| C(90)-C(91)       | 1.3899     |
| Cl(2)-Ag(6)#1     | 2.504(4)   |
| Cl(3)-Ag(5)#1     | 2.802(5)   |
| Cl(3)-Ag(6)#1     | 2.907(5)   |
| Cl(4)-Ag(4)#1     | 2.600(7)   |
| Cl(1)-Ag(1)-Au(6) | 179.70(12) |
| Cl(1)-Ag(1)-Au(2) | 122.52(12) |
| Au(6)-Ag(1)-Au(2) | 57.67(2)   |
| Cl(1)-Ag(1)-Au(4) | 122.97(12) |
| Au(6)-Ag(1)-Au(4) | 57.00(2)   |
| Au(2)-Ag(1)-Au(4) | 106.54(3)  |
| Cl(1)-Ag(1)-Au(3) | 123.67(11) |
| Au(6)-Ag(1)-Au(3) | 56.61(2)   |
| Au(2)-Ag(1)-Au(3) | 59.24(2)   |
| Au(4)-Ag(1)-Au(3) | 59.15(2)   |
| Cl(1)-Ag(1)-Au(1) | 122.80(11) |
| Au(6)-Ag(1)-Au(1) | 57.04(2)   |
| Au(2)-Ag(1)-Au(1) | 59.90(2)   |
| Au(4)-Ag(1)-Au(1) | 105.38(4)  |
| Au(3)-Ag(1)-Au(1) | 105.85(4)  |
| Cl(1)-Ag(1)-Au(5) | 124.40(11) |
| Au(6)-Ag(1)-Au(5) | 55.31(2)   |
| Au(2)-Ag(1)-Au(5) | 105.15(3)  |
| Au(4)-Ag(1)-Au(5) | 57.78(2)   |
| Au(3)-Ag(1)-Au(5) | 103.77(3)  |
| Au(1)-Ag(1)-Au(5) | 58.32(2)   |
| Cl(2)-Ag(2)-Au(6) | 160.45(13) |
| Cl(2)-Ag(2)-Au(1) | 137.14(10) |
| Au(6)-Ag(2)-Au(1) | 57.85(2)   |
| Cl(2)-Ag(2)-Au(2) | 113.39(13) |
| Au(6)-Ag(2)-Au(2) | 58.04(2)   |

|                              |                   |
|------------------------------|-------------------|
| <b>Au(1)-Ag(2)-Au(2)</b>     | <b>62.79(3)</b>   |
| <b>Cl(2)-Ag(2)-Au(7)</b>     | <b>114.97(10)</b> |
| <b>Au(6)-Ag(2)-Au(7)</b>     | <b>57.93(2)</b>   |
| <b>Au(1)-Ag(2)-Au(7)</b>     | <b>106.06(3)</b>  |
| <b>Au(2)-Ag(2)-Au(7)</b>     | <b>107.02(3)</b>  |
| <b>Cl(2)-Ag(2)-Ag(6)#1</b>   | <b>55.80(10)</b>  |
| <b>Au(6)-Ag(2)-Ag(6)#1</b>   | <b>111.77(4)</b>  |
| <b>Au(1)-Ag(2)-Ag(6)#1</b>   | <b>165.34(5)</b>  |
| <b>Au(2)-Ag(2)-Ag(6)#1</b>   | <b>122.62(4)</b>  |
| <b>Au(7)-Ag(2)-Ag(6)#1</b>   | <b>59.78(3)</b>   |
| <b>Cl(2)-Ag(2)-Ag(3)</b>     | <b>101.92(12)</b> |
| <b>Au(6)-Ag(2)-Ag(3)</b>     | <b>58.55(3)</b>   |
| <b>Au(1)-Ag(2)-Ag(3)</b>     | <b>109.45(4)</b>  |
| <b>Au(2)-Ag(2)-Ag(3)</b>     | <b>59.90(3)</b>   |
| <b>Au(7)-Ag(2)-Ag(3)</b>     | <b>59.24(3)</b>   |
| <b>Ag(6)#1-Ag(2)-Ag(3)</b>   | <b>67.84(4)</b>   |
| <b>Cl(2)-Ag(2)-Ag(6)</b>     | <b>135.00(13)</b> |
| <b>Au(6)-Ag(2)-Ag(6)</b>     | <b>59.88(3)</b>   |
| <b>Au(1)-Ag(2)-Ag(6)</b>     | <b>59.76(3)</b>   |
| <b>Au(2)-Ag(2)-Ag(6)</b>     | <b>110.48(4)</b>  |
| <b>Au(7)-Ag(2)-Ag(6)</b>     | <b>58.90(3)</b>   |
| <b>Ag(6)#1-Ag(2)-Ag(6)</b>   | <b>106.67(4)</b>  |
| <b>Ag(3)-Ag(2)-Ag(6)</b>     | <b>108.22(4)</b>  |
| <b>Cl(2)-Ag(2)-Ag(2)#1</b>   | <b>82.85(12)</b>  |
| <b>Au(6)-Ag(2)-Ag(2)#1</b>   | <b>103.74(3)</b>  |
| <b>Au(1)-Ag(2)-Ag(2)#1</b>   | <b>111.83(5)</b>  |
| <b>Au(2)-Ag(2)-Ag(2)#1</b>   | <b>161.54(3)</b>  |
| <b>Au(7)-Ag(2)-Ag(2)#1</b>   | <b>56.11(2)</b>   |
| <b>Ag(6)#1-Ag(2)-Ag(2)#1</b> | <b>58.30(4)</b>   |
| <b>Ag(3)-Ag(2)-Ag(2)#1</b>   | <b>109.71(3)</b>  |
| <b>Ag(6)-Ag(2)-Ag(2)#1</b>   | <b>56.03(4)</b>   |
| <b>Cl(3)-Ag(3)-Au(6)</b>     | <b>162.04(14)</b> |
| <b>Cl(3)-Ag(3)-Au(3)</b>     | <b>140.56(14)</b> |
| <b>Au(6)-Ag(3)-Au(3)</b>     | <b>57.34(2)</b>   |
| <b>Cl(3)-Ag(3)-Au(7)</b>     | <b>106.79(12)</b> |
| <b>Au(6)-Ag(3)-Au(7)</b>     | <b>57.68(2)</b>   |
| <b>Au(3)-Ag(3)-Au(7)</b>     | <b>106.45(3)</b>  |
| <b>Cl(3)-Ag(3)-Au(2)</b>     | <b>126.70(14)</b> |
| <b>Au(6)-Ag(3)-Au(2)</b>     | <b>57.38(2)</b>   |
| <b>Au(3)-Ag(3)-Au(2)</b>     | <b>61.65(3)</b>   |
| <b>Au(7)-Ag(3)-Au(2)</b>     | <b>105.62(3)</b>  |
| <b>Cl(3)-Ag(3)-Ag(4)</b>     | <b>122.95(15)</b> |
| <b>Au(6)-Ag(3)-Ag(4)</b>     | <b>59.61(3)</b>   |
| <b>Au(3)-Ag(3)-Ag(4)</b>     | <b>60.43(3)</b>   |

|                              |                   |
|------------------------------|-------------------|
| <b>Au(7)-Ag(3)-Ag(4)</b>     | <b>59.61(3)</b>   |
| <b>Au(2)-Ag(3)-Ag(4)</b>     | <b>109.79(4)</b>  |
| <b>Cl(3)-Ag(3)-Ag(2)</b>     | <b>107.36(16)</b> |
| <b>Au(6)-Ag(3)-Ag(2)</b>     | <b>58.08(3)</b>   |
| <b>Au(3)-Ag(3)-Ag(2)</b>     | <b>107.67(4)</b>  |
| <b>Au(7)-Ag(3)-Ag(2)</b>     | <b>58.94(3)</b>   |
| <b>Au(2)-Ag(3)-Ag(2)</b>     | <b>58.44(3)</b>   |
| <b>Ag(4)-Ag(3)-Ag(2)</b>     | <b>108.12(4)</b>  |
| <b>Cl(3)-Ag(3)-Ag(5)#1</b>   | <b>60.32(12)</b>  |
| <b>Au(6)-Ag(3)-Ag(5)#1</b>   | <b>110.09(4)</b>  |
| <b>Au(3)-Ag(3)-Ag(5)#1</b>   | <b>126.78(4)</b>  |
| <b>Au(7)-Ag(3)-Ag(5)#1</b>   | <b>56.47(3)</b>   |
| <b>Au(2)-Ag(3)-Ag(5)#1</b>   | <b>160.68(4)</b>  |
| <b>Ag(4)-Ag(3)-Ag(5)#1</b>   | <b>69.17(4)</b>   |
| <b>Ag(2)-Ag(3)-Ag(5)#1</b>   | <b>102.90(4)</b>  |
| <b>Cl(3)-Ag(3)-Ag(6)#1</b>   | <b>60.35(14)</b>  |
| <b>Au(6)-Ag(3)-Ag(6)#1</b>   | <b>101.71(4)</b>  |
| <b>Au(3)-Ag(3)-Ag(6)#1</b>   | <b>159.02(4)</b>  |
| <b>Au(7)-Ag(3)-Ag(6)#1</b>   | <b>55.42(3)</b>   |
| <b>Au(2)-Ag(3)-Ag(6)#1</b>   | <b>109.98(4)</b>  |
| <b>Ag(4)-Ag(3)-Ag(6)#1</b>   | <b>109.91(4)</b>  |
| <b>Ag(2)-Ag(3)-Ag(6)#1</b>   | <b>55.50(3)</b>   |
| <b>Ag(5)#1-Ag(3)-Ag(6)#1</b> | <b>55.36(3)</b>   |
| <b>Cl(4)#1-Ag(4)-Au(6)</b>   | <b>133.0(2)</b>   |
| <b>Cl(4)#1-Ag(4)-Au(7)</b>   | <b>98.97(13)</b>  |
| <b>Au(6)-Ag(4)-Au(7)</b>     | <b>56.91(2)</b>   |
| <b>Cl(4)#1-Ag(4)-Au(4)</b>   | <b>153.08(14)</b> |
| <b>Au(6)-Ag(4)-Au(4)</b>     | <b>56.22(2)</b>   |
| <b>Au(7)-Ag(4)-Au(4)</b>     | <b>104.72(3)</b>  |
| <b>Cl(4)#1-Ag(4)-Ag(5)</b>   | <b>145.40(17)</b> |
| <b>Au(6)-Ag(4)-Ag(5)</b>     | <b>59.93(3)</b>   |
| <b>Au(7)-Ag(4)-Ag(5)</b>     | <b>58.68(3)</b>   |
| <b>Au(4)-Ag(4)-Ag(5)</b>     | <b>60.77(3)</b>   |
| <b>Cl(4)#1-Ag(4)-Au(3)</b>   | <b>101.5(2)</b>   |
| <b>Au(6)-Ag(4)-Au(3)</b>     | <b>55.91(2)</b>   |
| <b>Au(7)-Ag(4)-Au(3)</b>     | <b>103.86(4)</b>  |
| <b>Au(4)-Ag(4)-Au(3)</b>     | <b>60.64(3)</b>   |
| <b>Ag(5)-Ag(4)-Au(3)</b>     | <b>109.09(4)</b>  |
| <b>Cl(4)#1-Ag(4)-Ag(3)</b>   | <b>75.1(2)</b>    |
| <b>Au(6)-Ag(4)-Ag(3)</b>     | <b>57.90(3)</b>   |
| <b>Au(7)-Ag(4)-Ag(3)</b>     | <b>58.97(3)</b>   |
| <b>Au(4)-Ag(4)-Ag(3)</b>     | <b>106.47(4)</b>  |
| <b>Ag(5)-Ag(4)-Ag(3)</b>     | <b>107.97(4)</b>  |
| <b>Au(3)-Ag(4)-Ag(3)</b>     | <b>57.74(3)</b>   |

|                       |            |
|-----------------------|------------|
| Cl(4)#1-Ag(4)-Ag(4)#1 | 78.40(18)  |
| Au(6)-Ag(4)-Ag(4)#1   | 108.25(3)  |
| Au(7)-Ag(4)-Ag(4)#1   | 55.35(2)   |
| Au(4)-Ag(4)-Ag(4)#1   | 125.95(5)  |
| Ag(5)-Ag(4)-Ag(4)#1   | 67.19(4)   |
| Au(3)-Ag(4)-Ag(4)#1   | 158.37(3)  |
| Ag(3)-Ag(4)-Ag(4)#1   | 102.14(4)  |
| Cl(4)-Ag(5)-Cl(3)#1   | 86.8(3)    |
| Cl(4)-Ag(5)-Au(7)     | 103.06(15) |
| Cl(3)#1-Ag(5)-Au(7)   | 96.60(10)  |
| Cl(4)-Ag(5)-Au(5)     | 153.31(16) |
| Cl(3)#1-Ag(5)-Au(5)   | 87.51(12)  |
| Au(7)-Ag(5)-Au(5)     | 103.49(4)  |
| Cl(4)-Ag(5)-Au(6)     | 146.7(2)   |
| Cl(3)#1-Ag(5)-Au(6)   | 119.76(13) |
| Au(7)-Ag(5)-Au(6)     | 57.27(2)   |
| Au(5)-Ag(5)-Au(6)     | 55.57(2)   |
| Cl(4)-Ag(5)-Ag(4)     | 87.9(2)    |
| Cl(3)#1-Ag(5)-Ag(4)   | 154.45(10) |
| Au(7)-Ag(5)-Ag(4)     | 60.43(3)   |
| Au(5)-Ag(5)-Ag(4)     | 107.66(4)  |
| Au(6)-Ag(5)-Ag(4)     | 59.32(3)   |
| Cl(4)-Ag(5)-Au(4)     | 115.0(2)   |
| Cl(3)#1-Ag(5)-Au(4)   | 143.99(11) |
| Au(7)-Ag(5)-Au(4)     | 105.13(3)  |
| Au(5)-Ag(5)-Au(4)     | 59.91(3)   |
| Au(6)-Ag(5)-Au(4)     | 55.66(2)   |
| Ag(4)-Ag(5)-Au(4)     | 59.58(3)   |
| Cl(4)-Ag(5)-Ag(6)     | 138.0(2)   |
| Cl(3)#1-Ag(5)-Ag(6)   | 60.91(13)  |
| Au(7)-Ag(5)-Ag(6)     | 59.32(3)   |
| Au(5)-Ag(5)-Ag(6)     | 57.71(3)   |
| Au(6)-Ag(5)-Ag(6)     | 59.19(3)   |
| Ag(4)-Ag(5)-Ag(6)     | 109.49(4)  |
| Au(4)-Ag(5)-Ag(6)     | 106.66(4)  |
| Cl(4)-Ag(5)-Ag(3)#1   | 73.54(19)  |
| Cl(3)#1-Ag(5)-Ag(3)#1 | 47.20(10)  |
| Au(7)-Ag(5)-Ag(3)#1   | 57.47(3)   |
| Au(5)-Ag(5)-Ag(3)#1   | 119.64(4)  |
| Au(6)-Ag(5)-Ag(3)#1   | 108.51(4)  |
| Ag(4)-Ag(5)-Ag(3)#1   | 107.43(4)  |
| Au(4)-Ag(5)-Ag(3)#1   | 162.56(4)  |
| Ag(6)-Ag(5)-Ag(3)#1   | 64.93(4)   |
| Cl(2)#1-Ag(6)-Au(5)   | 143.50(10) |

|                       |            |
|-----------------------|------------|
| Cl(2)#1-Ag(6)-Au(7)   | 111.59(10) |
| Au(5)-Ag(6)-Au(7)     | 103.82(4)  |
| Cl(2)#1-Ag(6)-Au(6)   | 142.14(13) |
| Au(5)-Ag(6)-Au(6)     | 55.98(2)   |
| Au(7)-Ag(6)-Au(6)     | 56.81(2)   |
| Cl(2)#1-Ag(6)-Au(1)   | 100.29(12) |
| Au(5)-Ag(6)-Au(1)     | 61.58(3)   |
| Au(7)-Ag(6)-Au(1)     | 104.05(3)  |
| Au(6)-Ag(6)-Au(1)     | 56.15(2)   |
| Cl(2)#1-Ag(6)-Ag(2)#1 | 52.79(9)   |
| Au(5)-Ag(6)-Ag(2)#1   | 163.17(5)  |
| Au(7)-Ag(6)-Ag(2)#1   | 59.37(3)   |
| Au(6)-Ag(6)-Ag(2)#1   | 109.03(4)  |
| Au(1)-Ag(6)-Ag(2)#1   | 118.76(5)  |
| Cl(2)#1-Ag(6)-Cl(3)#1 | 99.75(17)  |
| Au(5)-Ag(6)-Cl(3)#1   | 86.38(10)  |
| Au(7)-Ag(6)-Cl(3)#1   | 93.50(12)  |
| Au(6)-Ag(6)-Cl(3)#1   | 115.99(12) |
| Au(1)-Ag(6)-Cl(3)#1   | 146.14(10) |
| Ag(2)#1-Ag(6)-Cl(3)#1 | 95.09(10)  |
| Cl(2)#1-Ag(6)-Ag(5)   | 151.05(12) |
| Au(5)-Ag(6)-Ag(5)     | 59.31(3)   |
| Au(7)-Ag(6)-Ag(5)     | 58.15(3)   |
| Au(6)-Ag(6)-Ag(5)     | 58.93(3)   |
| Au(1)-Ag(6)-Ag(5)     | 108.41(4)  |
| Ag(2)#1-Ag(6)-Ag(5)   | 107.63(4)  |
| Cl(3)#1-Ag(6)-Ag(5)   | 57.37(12)  |
| Cl(2)#1-Ag(6)-Ag(2)   | 85.83(12)  |
| Au(5)-Ag(6)-Ag(2)     | 105.98(4)  |
| Au(7)-Ag(6)-Ag(2)     | 58.50(3)   |
| Au(6)-Ag(6)-Ag(2)     | 56.89(3)   |
| Au(1)-Ag(6)-Ag(2)     | 57.63(3)   |
| Ag(2)#1-Ag(6)-Ag(2)   | 65.68(4)   |
| Cl(3)#1-Ag(6)-Ag(2)   | 151.10(11) |
| Ag(5)-Ag(6)-Ag(2)     | 106.19(4)  |
| Cl(2)#1-Ag(6)-Ag(3)#1 | 91.79(12)  |
| Au(5)-Ag(6)-Ag(3)#1   | 116.22(4)  |
| Au(7)-Ag(6)-Ag(3)#1   | 55.33(3)   |
| Au(6)-Ag(6)-Ag(3)#1   | 104.36(4)  |
| Au(1)-Ag(6)-Ag(3)#1   | 159.09(4)  |
| Ag(2)#1-Ag(6)-Ag(3)#1 | 56.66(3)   |
| Cl(3)#1-Ag(6)-Ag(3)#1 | 45.02(10)  |
| Ag(5)-Ag(6)-Ag(3)#1   | 59.72(3)   |
| Ag(2)-Ag(6)-Ag(3)#1   | 106.91(4)  |

|                          |                   |
|--------------------------|-------------------|
| <b>P(1)-Au(1)-Au(6)</b>  | <b>177.12(12)</b> |
| <b>P(1)-Au(1)-Ag(2)</b>  | <b>117.89(12)</b> |
| <b>Au(6)-Au(1)-Ag(2)</b> | <b>60.37(2)</b>   |
| <b>P(1)-Au(1)-Ag(6)</b>  | <b>119.98(12)</b> |
| <b>Au(6)-Au(1)-Ag(6)</b> | <b>61.70(2)</b>   |
| <b>Ag(2)-Au(1)-Ag(6)</b> | <b>62.61(3)</b>   |
| <b>P(1)-Au(1)-Au(5)</b>  | <b>126.36(11)</b> |
| <b>Au(6)-Au(1)-Au(5)</b> | <b>56.426(17)</b> |
| <b>Ag(2)-Au(1)-Au(5)</b> | <b>106.90(3)</b>  |
| <b>Ag(6)-Au(1)-Au(5)</b> | <b>57.77(3)</b>   |
| <b>P(1)-Au(1)-Au(2)</b>  | <b>119.80(11)</b> |
| <b>Au(6)-Au(1)-Au(2)</b> | <b>57.436(16)</b> |
| <b>Ag(2)-Au(1)-Au(2)</b> | <b>58.87(3)</b>   |
| <b>Ag(6)-Au(1)-Au(2)</b> | <b>109.64(3)</b>  |
| <b>Au(5)-Au(1)-Au(2)</b> | <b>107.66(2)</b>  |
| <b>P(1)-Au(1)-Ag(1)</b>  | <b>123.44(12)</b> |
| <b>Au(6)-Au(1)-Ag(1)</b> | <b>56.48(2)</b>   |
| <b>Ag(2)-Au(1)-Ag(1)</b> | <b>107.74(3)</b>  |
| <b>Ag(6)-Au(1)-Ag(1)</b> | <b>109.53(3)</b>  |
| <b>Au(5)-Au(1)-Ag(1)</b> | <b>61.73(3)</b>   |
| <b>Au(2)-Au(1)-Ag(1)</b> | <b>59.73(3)</b>   |
| <b>P(2)-Au(2)-Au(6)</b>  | <b>179.23(10)</b> |
| <b>P(2)-Au(2)-Ag(2)</b>  | <b>120.78(10)</b> |
| <b>Au(6)-Au(2)-Ag(2)</b> | <b>59.98(2)</b>   |
| <b>P(2)-Au(2)-Ag(3)</b>  | <b>120.61(9)</b>  |
| <b>Au(6)-Au(2)-Ag(3)</b> | <b>59.76(2)</b>   |
| <b>Ag(2)-Au(2)-Ag(3)</b> | <b>61.66(3)</b>   |
| <b>P(2)-Au(2)-Au(3)</b>  | <b>122.68(9)</b>  |
| <b>Au(6)-Au(2)-Au(3)</b> | <b>56.813(16)</b> |
| <b>Ag(2)-Au(2)-Au(3)</b> | <b>107.31(3)</b>  |
| <b>Ag(3)-Au(2)-Au(3)</b> | <b>57.97(2)</b>   |
| <b>P(2)-Au(2)-Ag(1)</b>  | <b>122.73(10)</b> |
| <b>Au(6)-Au(2)-Ag(1)</b> | <b>56.57(2)</b>   |
| <b>Ag(2)-Au(2)-Ag(1)</b> | <b>107.82(3)</b>  |
| <b>Ag(3)-Au(2)-Ag(1)</b> | <b>107.68(3)</b>  |
| <b>Au(3)-Au(2)-Ag(1)</b> | <b>60.65(2)</b>   |
| <b>P(2)-Au(2)-Au(1)</b>  | <b>123.21(9)</b>  |
| <b>Au(6)-Au(2)-Au(1)</b> | <b>56.904(17)</b> |
| <b>Ag(2)-Au(2)-Au(1)</b> | <b>58.33(3)</b>   |
| <b>Ag(3)-Au(2)-Au(1)</b> | <b>107.35(3)</b>  |
| <b>Au(3)-Au(2)-Au(1)</b> | <b>107.30(2)</b>  |
| <b>Ag(1)-Au(2)-Au(1)</b> | <b>60.37(2)</b>   |
| <b>P(3)-Au(3)-Au(6)</b>  | <b>176.68(10)</b> |
| <b>P(3)-Au(3)-Ag(3)</b>  | <b>115.79(10)</b> |

|                          |                   |
|--------------------------|-------------------|
| <b>Au(6)-Au(3)-Ag(3)</b> | <b>61.10(2)</b>   |
| <b>P(3)-Au(3)-Ag(4)</b>  | <b>118.82(10)</b> |
| <b>Au(6)-Au(3)-Ag(4)</b> | <b>61.27(3)</b>   |
| <b>Ag(3)-Au(3)-Ag(4)</b> | <b>61.82(3)</b>   |
| <b>P(3)-Au(3)-Au(4)</b>  | <b>125.70(10)</b> |
| <b>Au(6)-Au(3)-Au(4)</b> | <b>57.467(17)</b> |
| <b>Ag(3)-Au(3)-Au(4)</b> | <b>108.90(3)</b>  |
| <b>Ag(4)-Au(3)-Au(4)</b> | <b>59.64(3)</b>   |
| <b>P(3)-Au(3)-Au(2)</b>  | <b>119.82(10)</b> |
| <b>Au(6)-Au(3)-Au(2)</b> | <b>58.038(17)</b> |
| <b>Ag(3)-Au(3)-Au(2)</b> | <b>60.38(2)</b>   |
| <b>Ag(4)-Au(3)-Au(2)</b> | <b>109.89(3)</b>  |
| <b>Au(4)-Au(3)-Au(2)</b> | <b>108.14(2)</b>  |
| <b>P(3)-Au(3)-Ag(1)</b>  | <b>125.08(11)</b> |
| <b>Au(6)-Au(3)-Ag(1)</b> | <b>56.72(2)</b>   |
| <b>Ag(3)-Au(3)-Ag(1)</b> | <b>109.19(3)</b>  |
| <b>Ag(4)-Au(3)-Ag(1)</b> | <b>109.20(3)</b>  |
| <b>Au(4)-Au(3)-Ag(1)</b> | <b>60.28(3)</b>   |
| <b>Au(2)-Au(3)-Ag(1)</b> | <b>60.11(2)</b>   |
| <b>P(4)-Au(4)-Au(6)</b>  | <b>174.68(11)</b> |
| <b>P(4)-Au(4)-Au(5)</b>  | <b>119.84(10)</b> |
| <b>Au(6)-Au(4)-Au(5)</b> | <b>56.872(17)</b> |
| <b>P(4)-Au(4)-Ag(4)</b>  | <b>124.03(11)</b> |
| <b>Au(6)-Au(4)-Ag(4)</b> | <b>61.16(3)</b>   |
| <b>Au(5)-Au(4)-Ag(4)</b> | <b>106.82(3)</b>  |
| <b>P(4)-Au(4)-Au(3)</b>  | <b>123.46(10)</b> |
| <b>Au(6)-Au(4)-Au(3)</b> | <b>57.051(17)</b> |
| <b>Au(5)-Au(4)-Au(3)</b> | <b>108.25(2)</b>  |
| <b>Ag(4)-Au(4)-Au(3)</b> | <b>59.71(3)</b>   |
| <b>P(4)-Au(4)-Ag(5)</b>  | <b>121.66(11)</b> |
| <b>Au(6)-Au(4)-Ag(5)</b> | <b>61.12(2)</b>   |
| <b>Au(5)-Au(4)-Ag(5)</b> | <b>58.79(3)</b>   |
| <b>Ag(4)-Au(4)-Ag(5)</b> | <b>59.65(3)</b>   |
| <b>Au(3)-Au(4)-Ag(5)</b> | <b>107.46(3)</b>  |
| <b>P(4)-Au(4)-Ag(1)</b>  | <b>118.39(11)</b> |
| <b>Au(6)-Au(4)-Ag(1)</b> | <b>56.70(2)</b>   |
| <b>Au(5)-Au(4)-Ag(1)</b> | <b>62.21(3)</b>   |
| <b>Ag(4)-Au(4)-Ag(1)</b> | <b>109.49(3)</b>  |
| <b>Au(3)-Au(4)-Ag(1)</b> | <b>60.56(2)</b>   |
| <b>Ag(5)-Au(4)-Ag(1)</b> | <b>109.97(3)</b>  |
| <b>P(5)-Au(5)-Au(6)</b>  | <b>177.61(12)</b> |
| <b>P(5)-Au(5)-Ag(6)</b>  | <b>115.13(11)</b> |
| <b>Au(6)-Au(5)-Ag(6)</b> | <b>63.40(3)</b>   |
| <b>P(5)-Au(5)-Ag(5)</b>  | <b>115.20(11)</b> |

|                          |                   |
|--------------------------|-------------------|
| <b>Au(6)-Au(5)-Ag(5)</b> | <b>62.54(3)</b>   |
| <b>Ag(6)-Au(5)-Ag(5)</b> | <b>62.98(4)</b>   |
| <b>P(5)-Au(5)-Au(4)</b>  | <b>121.85(10)</b> |
| <b>Au(6)-Au(5)-Au(4)</b> | <b>58.163(18)</b> |
| <b>Ag(6)-Au(5)-Au(4)</b> | <b>111.98(3)</b>  |
| <b>Ag(5)-Au(5)-Au(4)</b> | <b>61.31(3)</b>   |
| <b>P(5)-Au(5)-Au(1)</b>  | <b>123.31(10)</b> |
| <b>Au(6)-Au(5)-Au(1)</b> | <b>57.968(17)</b> |
| <b>Ag(6)-Au(5)-Au(1)</b> | <b>60.65(3)</b>   |
| <b>Ag(5)-Au(5)-Au(1)</b> | <b>110.54(3)</b>  |
| <b>Au(4)-Au(5)-Au(1)</b> | <b>108.49(2)</b>  |
| <b>P(5)-Au(5)-Ag(1)</b>  | <b>126.07(11)</b> |
| <b>Au(6)-Au(5)-Ag(1)</b> | <b>56.23(2)</b>   |
| <b>Ag(6)-Au(5)-Ag(1)</b> | <b>110.42(3)</b>  |
| <b>Ag(5)-Au(5)-Ag(1)</b> | <b>110.21(3)</b>  |
| <b>Au(4)-Au(5)-Ag(1)</b> | <b>60.00(2)</b>   |
| <b>Au(1)-Au(5)-Ag(1)</b> | <b>59.95(2)</b>   |
| <b>Au(5)-Au(6)-Au(3)</b> | <b>122.72(2)</b>  |
| <b>Au(5)-Au(6)-Ag(1)</b> | <b>68.46(3)</b>   |
| <b>Au(3)-Au(6)-Ag(1)</b> | <b>66.68(3)</b>   |
| <b>Au(5)-Au(6)-Au(4)</b> | <b>64.965(19)</b> |
| <b>Au(3)-Au(6)-Au(4)</b> | <b>65.483(19)</b> |
| <b>Ag(1)-Au(6)-Au(4)</b> | <b>66.29(3)</b>   |
| <b>Au(5)-Au(6)-Au(1)</b> | <b>65.606(19)</b> |
| <b>Au(3)-Au(6)-Au(1)</b> | <b>122.00(2)</b>  |
| <b>Ag(1)-Au(6)-Au(1)</b> | <b>66.47(3)</b>   |
| <b>Au(4)-Au(6)-Au(1)</b> | <b>120.61(2)</b>  |
| <b>Au(5)-Au(6)-Au(2)</b> | <b>122.68(2)</b>  |
| <b>Au(3)-Au(6)-Au(2)</b> | <b>65.149(19)</b> |
| <b>Ag(1)-Au(6)-Au(2)</b> | <b>65.76(3)</b>   |
| <b>Au(4)-Au(6)-Au(2)</b> | <b>120.90(2)</b>  |
| <b>Au(1)-Au(6)-Au(2)</b> | <b>65.660(19)</b> |
| <b>Au(5)-Au(6)-Au(7)</b> | <b>111.45(2)</b>  |
| <b>Au(3)-Au(6)-Au(7)</b> | <b>113.83(2)</b>  |
| <b>Ag(1)-Au(6)-Au(7)</b> | <b>179.26(4)</b>  |
| <b>Au(4)-Au(6)-Au(7)</b> | <b>114.38(3)</b>  |
| <b>Au(1)-Au(6)-Au(7)</b> | <b>112.80(3)</b>  |
| <b>Au(2)-Au(6)-Au(7)</b> | <b>113.87(2)</b>  |
| <b>Au(5)-Au(6)-Ag(2)</b> | <b>115.46(3)</b>  |
| <b>Au(3)-Au(6)-Ag(2)</b> | <b>115.74(3)</b>  |
| <b>Ag(1)-Au(6)-Ag(2)</b> | <b>117.09(3)</b>  |
| <b>Au(4)-Au(6)-Ag(2)</b> | <b>176.60(3)</b>  |
| <b>Au(1)-Au(6)-Ag(2)</b> | <b>61.79(3)</b>   |
| <b>Au(2)-Au(6)-Ag(2)</b> | <b>61.99(3)</b>   |

|                              |                  |
|------------------------------|------------------|
| <b>Au(7)-Au(6)-Ag(2)</b>     | <b>62.24(3)</b>  |
| <b>Au(5)-Au(6)-Ag(3)</b>     | <b>173.64(3)</b> |
| <b>Au(3)-Au(6)-Ag(3)</b>     | <b>61.56(3)</b>  |
| <b>Ag(1)-Au(6)-Ag(3)</b>     | <b>117.82(3)</b> |
| <b>Au(4)-Au(6)-Ag(3)</b>     | <b>115.80(3)</b> |
| <b>Au(1)-Au(6)-Ag(3)</b>     | <b>117.01(3)</b> |
| <b>Au(2)-Au(6)-Ag(3)</b>     | <b>62.86(3)</b>  |
| <b>Au(7)-Au(6)-Ag(3)</b>     | <b>62.27(2)</b>  |
| <b>Ag(2)-Au(6)-Ag(3)</b>     | <b>63.37(3)</b>  |
| <b>Au(5)-Au(6)-Ag(4)</b>     | <b>114.32(3)</b> |
| <b>Au(3)-Au(6)-Ag(4)</b>     | <b>62.82(3)</b>  |
| <b>Ag(1)-Au(6)-Ag(4)</b>     | <b>118.67(3)</b> |
| <b>Au(4)-Au(6)-Ag(4)</b>     | <b>62.62(3)</b>  |
| <b>Au(1)-Au(6)-Ag(4)</b>     | <b>174.70(3)</b> |
| <b>Au(2)-Au(6)-Ag(4)</b>     | <b>116.96(3)</b> |
| <b>Au(7)-Au(6)-Ag(4)</b>     | <b>62.06(3)</b>  |
| <b>Ag(2)-Au(6)-Ag(4)</b>     | <b>114.79(4)</b> |
| <b>Ag(3)-Au(6)-Ag(4)</b>     | <b>62.49(3)</b>  |
| <b>Au(5)-Au(6)-Ag(5)</b>     | <b>61.89(3)</b>  |
| <b>Au(3)-Au(6)-Ag(5)</b>     | <b>115.79(3)</b> |
| <b>Ag(1)-Au(6)-Ag(5)</b>     | <b>119.76(4)</b> |
| <b>Au(4)-Au(6)-Ag(5)</b>     | <b>63.22(3)</b>  |
| <b>Au(1)-Au(6)-Ag(5)</b>     | <b>116.18(3)</b> |
| <b>Au(2)-Au(6)-Ag(5)</b>     | <b>174.46(3)</b> |
| <b>Au(7)-Au(6)-Ag(5)</b>     | <b>60.61(3)</b>  |
| <b>Ag(2)-Au(6)-Ag(5)</b>     | <b>113.77(3)</b> |
| <b>Ag(3)-Au(6)-Ag(5)</b>     | <b>112.39(3)</b> |
| <b>Ag(4)-Au(6)-Ag(5)</b>     | <b>60.75(3)</b>  |
| <b>Au(5)-Au(6)-Ag(6)</b>     | <b>60.62(3)</b>  |
| <b>Au(3)-Au(6)-Ag(6)</b>     | <b>175.14(3)</b> |
| <b>Ag(1)-Au(6)-Ag(6)</b>     | <b>118.15(3)</b> |
| <b>Au(4)-Au(6)-Ag(6)</b>     | <b>115.27(3)</b> |
| <b>Au(1)-Au(6)-Ag(6)</b>     | <b>62.15(3)</b>  |
| <b>Au(2)-Au(6)-Ag(6)</b>     | <b>116.71(3)</b> |
| <b>Au(7)-Au(6)-Ag(6)</b>     | <b>61.35(3)</b>  |
| <b>Ag(2)-Au(6)-Ag(6)</b>     | <b>63.22(3)</b>  |
| <b>Ag(3)-Au(6)-Ag(6)</b>     | <b>114.79(3)</b> |
| <b>Ag(4)-Au(6)-Ag(6)</b>     | <b>112.92(4)</b> |
| <b>Ag(5)-Au(6)-Ag(6)</b>     | <b>61.88(4)</b>  |
| <b>Au(6)#1-Au(7)-Au(6)</b>   | <b>174.09(5)</b> |
| <b>Au(6)#1-Au(7)-Ag(5)#1</b> | <b>62.12(2)</b>  |
| <b>Au(6)-Au(7)-Ag(5)#1</b>   | <b>121.04(3)</b> |
| <b>Au(6)#1-Au(7)-Ag(5)</b>   | <b>121.04(3)</b> |
| <b>Au(6)-Au(7)-Ag(5)</b>     | <b>62.12(2)</b>  |

|                       |           |
|-----------------------|-----------|
| Ag(5)#1-Au(7)-Ag(5)   | 124.53(6) |
| Au(6)#1-Au(7)-Ag(2)   | 114.65(4) |
| Au(6)-Au(7)-Ag(2)     | 59.83(2)  |
| Ag(5)#1-Au(7)-Ag(2)   | 112.43(3) |
| Ag(5)-Au(7)-Ag(2)     | 113.01(3) |
| Au(6)#1-Au(7)-Ag(2)#1 | 59.82(2)  |
| Au(6)-Au(7)-Ag(2)#1   | 114.65(4) |
| Ag(5)#1-Au(7)-Ag(2)#1 | 113.01(3) |
| Ag(5)-Au(7)-Ag(2)#1   | 112.44(3) |
| Ag(2)-Au(7)-Ag(2)#1   | 67.78(5)  |
| Au(6)#1-Au(7)-Ag(3)   | 120.20(2) |
| Au(6)-Au(7)-Ag(3)     | 60.05(2)  |
| Ag(5)#1-Au(7)-Ag(3)   | 66.06(3)  |
| Ag(5)-Au(7)-Ag(3)     | 111.81(3) |
| Ag(2)-Au(7)-Ag(3)     | 61.82(3)  |
| Ag(2)#1-Au(7)-Ag(3)   | 122.24(4) |
| Au(6)#1-Au(7)-Ag(3)#1 | 60.05(2)  |
| Au(6)-Au(7)-Ag(3)#1   | 120.20(2) |
| Ag(5)#1-Au(7)-Ag(3)#1 | 111.81(3) |
| Ag(5)-Au(7)-Ag(3)#1   | 66.06(3)  |
| Ag(2)-Au(7)-Ag(3)#1   | 122.24(4) |
| Ag(2)#1-Au(7)-Ag(3)#1 | 61.81(3)  |
| Ag(3)-Au(7)-Ag(3)#1   | 175.78(6) |
| Au(6)#1-Au(7)-Ag(6)#1 | 61.84(2)  |
| Au(6)-Au(7)-Ag(6)#1   | 114.40(3) |
| Ag(5)#1-Au(7)-Ag(6)#1 | 62.54(3)  |
| Ag(5)-Au(7)-Ag(6)#1   | 172.87(5) |
| Ag(2)-Au(7)-Ag(6)#1   | 60.85(3)  |
| Ag(2)#1-Au(7)-Ag(6)#1 | 62.60(3)  |
| Ag(3)-Au(7)-Ag(6)#1   | 69.25(3)  |
| Ag(3)#1-Au(7)-Ag(6)#1 | 113.34(3) |
| Au(6)#1-Au(7)-Ag(6)   | 114.40(3) |
| Au(6)-Au(7)-Ag(6)     | 61.84(2)  |
| Ag(5)#1-Au(7)-Ag(6)   | 172.88(5) |
| Ag(5)-Au(7)-Ag(6)     | 62.53(3)  |
| Ag(2)-Au(7)-Ag(6)     | 62.60(3)  |
| Ag(2)#1-Au(7)-Ag(6)   | 60.85(3)  |
| Ag(3)-Au(7)-Ag(6)     | 113.34(3) |
| Ag(3)#1-Au(7)-Ag(6)   | 69.26(3)  |
| Ag(6)#1-Au(7)-Ag(6)   | 110.42(6) |
| Au(6)#1-Au(7)-Ag(4)   | 124.70(4) |
| Au(6)-Au(7)-Ag(4)     | 61.02(2)  |
| Ag(5)#1-Au(7)-Ag(4)   | 73.79(4)  |
| Ag(5)-Au(7)-Ag(4)     | 60.89(3)  |

|                       |           |
|-----------------------|-----------|
| Ag(2)-Au(7)-Ag(4)     | 111.91(3) |
| Ag(2)#1-Au(7)-Ag(4)   | 172.97(3) |
| Ag(3)-Au(7)-Ag(4)     | 61.43(3)  |
| Ag(3)#1-Au(7)-Ag(4)   | 114.70(4) |
| Ag(6)#1-Au(7)-Ag(4)   | 123.81(3) |
| Ag(6)-Au(7)-Ag(4)     | 112.48(3) |
| Au(6)#1-Au(7)-Ag(4)#1 | 61.02(2)  |
| Au(6)-Au(7)-Ag(4)#1   | 124.70(4) |
| Ag(5)#1-Au(7)-Ag(4)#1 | 60.89(3)  |
| Ag(5)-Au(7)-Ag(4)#1   | 73.79(4)  |
| Ag(2)-Au(7)-Ag(4)#1   | 172.97(3) |
| Ag(2)#1-Au(7)-Ag(4)#1 | 111.91(3) |
| Ag(3)-Au(7)-Ag(4)#1   | 114.70(4) |
| Ag(3)#1-Au(7)-Ag(4)#1 | 61.42(3)  |
| Ag(6)#1-Au(7)-Ag(4)#1 | 112.48(3) |
| Ag(6)-Au(7)-Ag(4)#1   | 123.81(3) |
| Ag(4)-Au(7)-Ag(4)#1   | 69.31(5)  |
| C(2)-C(1)-C(6)        | 120.0     |
| C(2)-C(1)-P(1)        | 117.0(2)  |
| C(6)-C(1)-P(1)        | 123.0(2)  |
| C(1)-C(2)-C(3)        | 120.0     |
| C(2)-C(3)-C(4)        | 120.0     |
| C(5)-C(4)-C(3)        | 120.0     |
| C(6)-C(5)-C(4)        | 120.0     |
| C(5)-C(6)-C(1)        | 120.0     |
| C(12)-C(7)-C(8)       | 120.0     |
| C(12)-C(7)-P(1)       | 118.0(2)  |
| C(8)-C(7)-P(1)        | 122.0(2)  |
| C(9)-C(8)-C(7)        | 120.0     |
| C(10)-C(9)-C(8)       | 120.0     |
| C(9)-C(10)-C(11)      | 120.0     |
| C(10)-C(11)-C(12)     | 120.0     |
| C(11)-C(12)-C(7)      | 120.0     |
| C(14)-C(13)-C(18)     | 120.0     |
| C(14)-C(13)-P(1)      | 117.2(3)  |
| C(18)-C(13)-P(1)      | 122.6(3)  |
| C(13)-C(14)-C(15)     | 120.0     |
| C(16)-C(15)-C(14)     | 120.0     |
| C(15)-C(16)-C(17)     | 120.0     |
| C(18)-C(17)-C(16)     | 120.0     |
| C(17)-C(18)-C(13)     | 120.0     |
| C(20)-C(19)-C(24)     | 120.0     |
| C(20)-C(19)-P(2)      | 123.0(7)  |
| C(24)-C(19)-P(2)      | 116.7(7)  |

|                   |          |
|-------------------|----------|
| C(21)-C(20)-C(19) | 120.0    |
| C(20)-C(21)-C(22) | 120.0    |
| C(23)-C(22)-C(21) | 120.0    |
| C(24)-C(23)-C(22) | 120.0    |
| C(23)-C(24)-C(19) | 120.0    |
| C(26)-C(25)-C(30) | 120.0    |
| C(26)-C(25)-P(2)  | 120.9(7) |
| C(30)-C(25)-P(2)  | 119.1(7) |
| C(27)-C(26)-C(25) | 120.0    |
| C(26)-C(27)-C(28) | 120.0    |
| C(29)-C(28)-C(27) | 120.0    |
| C(28)-C(29)-C(30) | 120.0    |
| C(29)-C(30)-C(25) | 120.0    |
| C(32)-C(31)-C(36) | 120.0    |
| C(32)-C(31)-P(2)  | 124.2(8) |
| C(36)-C(31)-P(2)  | 115.7(8) |
| C(31)-C(32)-C(33) | 120.0    |
| C(34)-C(33)-C(32) | 120.0    |
| C(33)-C(34)-C(35) | 120.0    |
| C(36)-C(35)-C(34) | 120.0    |
| C(35)-C(36)-C(31) | 120.0    |
| C(38)-C(37)-C(42) | 120.0    |
| C(38)-C(37)-P(3)  | 121.9(8) |
| C(42)-C(37)-P(3)  | 118.0(8) |
| C(37)-C(38)-C(39) | 120.0    |
| C(38)-C(39)-C(40) | 120.0    |
| C(41)-C(40)-C(39) | 120.0    |
| C(42)-C(41)-C(40) | 120.0    |
| C(41)-C(42)-C(37) | 120.0    |
| C(44)-C(43)-C(48) | 120.0    |
| C(44)-C(43)-P(3)  | 126.5(4) |
| C(48)-C(43)-P(3)  | 113.5(4) |
| C(45)-C(44)-C(43) | 120.0    |
| C(44)-C(45)-C(46) | 120.0    |
| C(47)-C(46)-C(45) | 120.0    |
| C(48)-C(47)-C(46) | 120.0    |
| C(47)-C(48)-C(43) | 120.0    |
| C(50)-C(49)-C(54) | 120.0    |
| C(50)-C(49)-P(3)  | 119.1(3) |
| C(54)-C(49)-P(3)  | 120.9(3) |
| C(49)-C(50)-C(51) | 120.0    |
| C(52)-C(51)-C(50) | 120.0    |
| C(53)-C(52)-C(51) | 120.0    |
| C(54)-C(53)-C(52) | 120.0    |

|                   |            |
|-------------------|------------|
| C(53)-C(54)-C(49) | 120.0      |
| C(56)-C(55)-C(60) | 120.0      |
| C(56)-C(55)-P(4)  | 122.0(14)  |
| C(60)-C(55)-P(4)  | 118.0(14)  |
| C(57)-C(56)-C(55) | 120.0      |
| C(56)-C(57)-C(58) | 120.0      |
| C(59)-C(58)-C(57) | 120.0      |
| C(58)-C(59)-C(60) | 120.0      |
| C(59)-C(60)-C(55) | 120.0      |
| C(62)-C(61)-C(66) | 120.0      |
| C(62)-C(61)-P(4)  | 124.1(2)   |
| C(66)-C(61)-P(4)  | 115.2(2)   |
| C(63)-C(62)-C(61) | 120.0      |
| C(62)-C(63)-C(64) | 120.0      |
| C(63)-C(64)-C(65) | 120.0      |
| C(66)-C(65)-C(64) | 120.0      |
| C(65)-C(66)-C(61) | 120.0      |
| C(68)-C(67)-C(72) | 120.0      |
| C(68)-C(67)-P(4)  | 115.6(2)   |
| C(72)-C(67)-P(4)  | 124.4(2)   |
| C(67)-C(68)-C(69) | 120.0      |
| C(70)-C(69)-C(68) | 120.0      |
| C(69)-C(70)-C(71) | 120.0      |
| C(70)-C(71)-C(72) | 120.0      |
| C(71)-C(72)-C(67) | 120.0      |
| C(75)-C(74)-C(79) | 120.0      |
| C(75)-C(74)-P(5)  | 121.54(19) |
| C(79)-C(74)-P(5)  | 118.05(19) |
| C(74)-C(75)-C(76) | 120.0      |
| C(75)-C(76)-C(77) | 120.0      |
| C(76)-C(77)-C(78) | 120.0      |
| C(79)-C(78)-C(77) | 120.0      |
| C(78)-C(79)-C(74) | 120.0      |
| C(81)-C(80)-C(85) | 120.0      |
| C(81)-C(80)-P(5)  | 122.98(19) |
| C(85)-C(80)-P(5)  | 117.01(19) |
| C(82)-C(81)-C(80) | 120.0      |
| C(81)-C(82)-C(83) | 120.0      |
| C(82)-C(83)-C(84) | 120.0      |
| C(83)-C(84)-C(85) | 120.0      |
| C(84)-C(85)-C(80) | 120.0      |
| C(87)-C(86)-C(91) | 120.0      |
| C(87)-C(86)-P(5)  | 121.33(19) |
| C(91)-C(86)-P(5)  | 118.64(19) |

|                       |           |
|-----------------------|-----------|
| C(86)-C(87)-C(88)     | 120.0     |
| C(89)-C(88)-C(87)     | 120.0     |
| C(88)-C(89)-C(90)     | 120.0     |
| C(91)-C(90)-C(89)     | 120.0     |
| C(90)-C(91)-C(86)     | 120.0     |
| Ag(2)-Cl(2)-Ag(6)#1   | 71.42(11) |
| Ag(3)-Cl(3)-Ag(5)#1   | 72.47(13) |
| Ag(3)-Cl(3)-Ag(6)#1   | 74.63(13) |
| Ag(5)#1-Cl(3)-Ag(6)#1 | 61.72(10) |
| Ag(5)-Cl(4)-Ag(4)#1   | 83.76(18) |
| C(1)-P(1)-C(7)        | 105.6(4)  |
| C(1)-P(1)-C(13)       | 103.2(4)  |
| C(7)-P(1)-C(13)       | 106.1(4)  |
| C(1)-P(1)-Au(1)       | 116.4(3)  |
| C(7)-P(1)-Au(1)       | 112.0(3)  |
| C(13)-P(1)-Au(1)      | 112.5(3)  |
| C(31)-P(2)-C(25)      | 106.0(6)  |
| C(31)-P(2)-C(19)      | 104.5(5)  |
| C(25)-P(2)-C(19)      | 100.6(5)  |
| C(31)-P(2)-Au(2)      | 111.8(4)  |
| C(25)-P(2)-Au(2)      | 116.1(4)  |
| C(19)-P(2)-Au(2)      | 116.4(4)  |
| C(37)-P(3)-C(43)      | 103.3(5)  |
| C(37)-P(3)-C(49)      | 108.4(5)  |
| C(43)-P(3)-C(49)      | 104.4(4)  |
| C(37)-P(3)-Au(3)      | 114.1(5)  |
| C(43)-P(3)-Au(3)      | 111.8(3)  |
| C(49)-P(3)-Au(3)      | 114.0(3)  |
| C(61)-P(4)-C(55)      | 106.4(5)  |
| C(61)-P(4)-C(67)      | 106.1(4)  |
| C(55)-P(4)-C(67)      | 102.7(6)  |
| C(61)-P(4)-Au(4)      | 111.2(2)  |
| C(55)-P(4)-Au(4)      | 116.8(7)  |
| C(67)-P(4)-Au(4)      | 112.8(3)  |
| C(86)-P(5)-C(74)      | 108.5(3)  |
| C(86)-P(5)-C(80)      | 104.1(3)  |
| C(74)-P(5)-C(80)      | 104.7(3)  |
| C(86)-P(5)-Au(5)      | 111.6(3)  |
| C(74)-P(5)-Au(5)      | 111.5(2)  |
| C(80)-P(5)-Au(5)      | 115.9(3)  |

---

Symmetry transformations used to generate equivalent atoms:

#1 -x,y,-z+1/2

**Table S5.** Anisotropic displacement parameters ( $\text{Å}^2 \times 10^3$ ) for  $[\text{Au}_{13}\text{Ag}_{12}(\text{PPh}_3)_{10}\text{Cl}_8]^+$ . The anisotropic displacement factor exponent takes the form:  $-2 \pi^2 [h^2 a^{*2} U_{11} + \dots + 2 h k a^* b^* U_{12}]$

|       | U11     | U22     | U33     | U23     | U13     | U12     |
|-------|---------|---------|---------|---------|---------|---------|
| Ag(1) | 46(1)   | 62(1)   | 50(1)   | -6(1)   | 32(1)   | -6(1)   |
| Ag(2) | 51(1)   | 50(1)   | 54(1)   | 0(1)    | 35(1)   | 1(1)    |
| Ag(3) | 42(1)   | 63(1)   | 34(1)   | -3(1)   | 21(1)   | -5(1)   |
| Ag(4) | 56(1)   | 55(1)   | 60(1)   | 1(1)    | 37(1)   | -8(1)   |
| Ag(5) | 48(1)   | 73(1)   | 44(1)   | 11(1)   | 28(1)   | 6(1)    |
| Ag(6) | 49(1)   | 72(1)   | 47(1)   | -19(1)  | 30(1)   | -5(1)   |
| Au(1) | 53(1)   | 47(1)   | 52(1)   | -12(1)  | 31(1)   | -13(1)  |
| Au(2) | 52(1)   | 47(1)   | 39(1)   | 0(1)    | 30(1)   | -5(1)   |
| Au(3) | 52(1)   | 49(1)   | 36(1)   | -9(1)   | 27(1)   | -5(1)   |
| Au(4) | 49(1)   | 52(1)   | 47(1)   | -1(1)   | 27(1)   | 2(1)    |
| Au(5) | 37(1)   | 65(1)   | 35(1)   | -7(1)   | 16(1)   | -3(1)   |
| Au(6) | 36(1)   | 43(1)   | 28(1)   | -5(1)   | 19(1)   | -4(1)   |
| Au(7) | 63(1)   | 93(1)   | 57(1)   | 0       | 38(1)   | 0       |
| C(1)  | 85(13)  | 74(11)  | 83(12)  | -5(9)   | 55(11)  | -10(9)  |
| C(2)  | 85(13)  | 80(12)  | 97(14)  | -1(10)  | 51(12)  | -4(10)  |
| C(3)  | 90(14)  | 79(12)  | 93(14)  | 5(10)   | 55(12)  | 2(11)   |
| C(4)  | 93(15)  | 82(13)  | 97(14)  | -3(11)  | 56(13)  | 7(11)   |
| C(5)  | 95(15)  | 79(13)  | 101(15) | -3(10)  | 56(13)  | 0(11)   |
| C(6)  | 90(14)  | 74(12)  | 95(14)  | -4(10)  | 52(12)  | -7(10)  |
| C(7)  | 124(19) | 123(19) | 140(20) | 6(17)   | 87(17)  | -12(16) |
| C(8)  | 140(20) | 130(20) | 150(20) | 13(17)  | 90(19)  | -9(17)  |
| C(9)  | 150(20) | 140(20) | 150(20) | 13(18)  | 100(20) | -12(18) |
| C(10) | 140(20) | 150(20) | 150(20) | 12(19)  | 96(19)  | -14(19) |
| C(11) | 140(20) | 140(20) | 150(20) | 7(18)   | 95(19)  | -7(17)  |
| C(12) | 130(20) | 130(20) | 140(20) | 5(16)   | 90(18)  | -9(16)  |
| C(13) | 103(17) | 90(15)  | 105(17) | -8(12)  | 43(14)  | -19(13) |
| C(14) | 150(20) | 130(20) | 120(20) | -3(16)  | 75(19)  | -13(17) |
| C(15) | 150(20) | 140(20) | 130(20) | -3(18)  | 70(20)  | -10(20) |
| C(16) | 150(20) | 140(20) | 130(20) | -3(17)  | 80(20)  | -1(19)  |
| C(17) | 150(20) | 140(20) | 140(20) | -9(19)  | 70(20)  | 2(18)   |
| C(18) | 140(20) | 130(20) | 140(20) | -12(18) | 80(20)  | -3(19)  |
| C(19) | 82(12)  | 68(10)  | 70(11)  | 2(8)    | 50(10)  | -4(9)   |
| C(20) | 86(13)  | 76(12)  | 80(12)  | 2(9)    | 52(11)  | -9(10)  |
| C(21) | 97(14)  | 80(13)  | 87(13)  | 7(10)   | 54(12)  | -8(11)  |
| C(22) | 102(15) | 77(13)  | 93(14)  | 5(10)   | 55(13)  | -3(11)  |
| C(23) | 101(15) | 73(12)  | 93(14)  | 2(10)   | 57(12)  | 3(10)   |
| C(24) | 94(13)  | 75(12)  | 86(13)  | -1(10)  | 57(11)  | -1(10)  |

|       |         |         |         |         |        |         |
|-------|---------|---------|---------|---------|--------|---------|
| C(25) | 74(11)  | 84(12)  | 70(11)  | 2(9)    | 50(10) | -3(9)   |
| C(26) | 82(13)  | 85(12)  | 70(11)  | 11(9)   | 49(11) | -4(10)  |
| C(27) | 87(14)  | 93(13)  | 83(13)  | 9(10)   | 48(12) | 0(11)   |
| C(28) | 85(14)  | 103(15) | 90(14)  | 6(11)   | 53(12) | -2(11)  |
| C(29) | 81(14)  | 103(14) | 92(14)  | 5(11)   | 55(12) | -6(11)  |
| C(30) | 80(13)  | 89(12)  | 76(12)  | 9(10)   | 53(11) | -4(10)  |
| C(31) | 78(12)  | 77(11)  | 70(11)  | 4(9)    | 55(10) | -10(9)  |
| C(32) | 86(13)  | 78(11)  | 70(12)  | -3(9)   | 54(11) | -8(9)   |
| C(33) | 95(14)  | 88(13)  | 79(13)  | -3(10)  | 59(12) | 1(11)   |
| C(34) | 98(15)  | 98(14)  | 87(14)  | -4(11)  | 62(13) | 5(12)   |
| C(35) | 92(14)  | 106(15) | 87(15)  | 5(12)   | 57(13) | 11(12)  |
| C(36) | 86(14)  | 96(13)  | 83(13)  | 7(10)   | 56(12) | 4(11)   |
| C(37) | 82(13)  | 93(13)  | 83(13)  | -17(10) | 60(11) | 2(10)   |
| C(38) | 90(14)  | 102(14) | 92(14)  | -24(11) | 59(12) | 0(11)   |
| C(39) | 97(15)  | 111(15) | 99(15)  | -30(12) | 67(13) | 9(12)   |
| C(40) | 94(15)  | 114(16) | 105(16) | -26(12) | 66(13) | 4(12)   |
| C(41) | 89(14)  | 109(15) | 109(16) | -30(12) | 62(13) | -2(12)  |
| C(42) | 85(14)  | 102(14) | 99(14)  | -28(11) | 59(13) | 3(11)   |
| C(43) | 82(12)  | 73(11)  | 67(11)  | -14(8)  | 47(10) | 6(9)    |
| C(44) | 87(13)  | 73(11)  | 74(12)  | -1(9)   | 45(11) | -4(9)   |
| C(45) | 97(15)  | 84(13)  | 79(13)  | 6(10)   | 45(12) | -6(11)  |
| C(46) | 99(16)  | 91(14)  | 86(14)  | -1(11)  | 46(13) | 8(12)   |
| C(47) | 93(15)  | 103(15) | 89(15)  | 3(12)   | 47(13) | 11(12)  |
| C(48) | 89(14)  | 95(13)  | 79(13)  | -4(10)  | 50(12) | 11(11)  |
| C(49) | 91(13)  | 85(12)  | 92(14)  | -13(10) | 68(12) | -5(10)  |
| C(50) | 104(16) | 95(14)  | 99(15)  | -13(12) | 62(13) | -8(12)  |
| C(51) | 113(17) | 93(15)  | 110(17) | -20(13) | 63(15) | -11(13) |
| C(52) | 122(19) | 96(16)  | 116(18) | -5(14)  | 63(16) | -12(13) |
| C(53) | 130(20) | 100(17) | 112(18) | 10(14)  | 61(16) | -19(14) |
| C(54) | 118(17) | 93(15)  | 103(16) | 4(12)   | 60(14) | -14(13) |
| C(55) | 115(18) | 104(18) | 112(18) | 4(14)   | 63(15) | -6(14)  |
| C(56) | 120(20) | 106(18) | 120(19) | 8(15)   | 63(16) | -1(15)  |
| C(57) | 130(20) | 110(20) | 130(20) | 11(17)  | 67(18) | -2(16)  |
| C(58) | 140(20) | 120(20) | 130(20) | 17(17)  | 75(19) | -2(18)  |
| C(59) | 140(20) | 130(20) | 130(20) | 19(16)  | 79(18) | -4(18)  |
| C(60) | 130(20) | 116(18) | 116(19) | 13(15)  | 73(17) | -9(15)  |
| C(61) | 89(14)  | 96(14)  | 105(15) | -2(12)  | 59(13) | 2(12)   |
| C(62) | 96(16)  | 107(16) | 116(17) | 1(13)   | 56(14) | 0(13)   |
| C(63) | 95(16)  | 119(18) | 118(17) | 0(14)   | 60(15) | 1(14)   |
| C(64) | 99(16)  | 116(18) | 118(18) | 0(14)   | 61(15) | -2(14)  |
| C(65) | 96(16)  | 114(17) | 123(18) | 6(14)   | 64(15) | -4(13)  |
| C(66) | 91(15)  | 106(16) | 118(17) | 4(13)   | 60(14) | 1(12)   |
| C(67) | 140(20) | 130(20) | 130(20) | -20(16) | 86(19) | 2(17)   |
| C(68) | 150(20) | 150(20) | 140(20) | -25(18) | 90(20) | -6(18)  |

|       |         |         |         |         |        |         |
|-------|---------|---------|---------|---------|--------|---------|
| C(69) | 150(20) | 150(20) | 140(20) | -28(18) | 90(20) | -7(19)  |
| C(70) | 150(30) | 150(20) | 140(20) | -23(18) | 90(20) | -3(19)  |
| C(71) | 150(20) | 160(30) | 140(20) | -27(18) | 90(20) | -1(19)  |
| C(72) | 150(20) | 150(20) | 140(20) | -25(18) | 90(20) | 0(18)   |
| C(74) | 81(13)  | 86(13)  | 71(12)  | 1(9)    | 44(11) | 7(10)   |
| C(75) | 85(13)  | 87(12)  | 81(13)  | -5(10)  | 48(11) | 11(10)  |
| C(76) | 98(15)  | 93(14)  | 89(14)  | 1(11)   | 49(12) | 10(12)  |
| C(77) | 101(16) | 97(15)  | 95(15)  | 6(12)   | 53(13) | 13(12)  |
| C(78) | 100(15) | 96(14)  | 98(15)  | 13(12)  | 54(13) | 2(12)   |
| C(79) | 89(14)  | 91(14)  | 89(14)  | 13(11)  | 48(12) | 3(11)   |
| C(80) | 69(11)  | 88(12)  | 70(11)  | -7(9)   | 49(10) | -6(9)   |
| C(81) | 85(14)  | 104(14) | 79(13)  | -9(11)  | 48(11) | 5(11)   |
| C(82) | 96(15)  | 110(16) | 78(13)  | -16(11) | 50(12) | 1(12)   |
| C(83) | 100(15) | 102(15) | 86(14)  | -18(11) | 55(13) | 2(12)   |
| C(84) | 97(15)  | 94(14)  | 87(14)  | -20(11) | 51(12) | 5(11)   |
| C(85) | 83(13)  | 87(13)  | 78(12)  | -15(10) | 47(11) | -1(10)  |
| C(86) | 75(12)  | 85(12)  | 74(12)  | -4(10)  | 46(10) | -3(10)  |
| C(87) | 78(13)  | 94(13)  | 82(13)  | 0(10)   | 45(11) | -13(10) |
| C(88) | 83(13)  | 107(15) | 90(14)  | -2(11)  | 53(12) | -12(11) |
| C(89) | 89(14)  | 110(15) | 94(15)  | 1(12)   | 52(13) | -16(12) |
| C(90) | 89(14)  | 112(16) | 91(14)  | -4(12)  | 56(13) | -13(12) |
| C(91) | 81(13)  | 100(14) | 82(13)  | -10(11) | 52(11) | -5(10)  |
| Cl(1) | 61(3)   | 109(3)  | 75(3)   | -8(2)   | 47(2)  | -15(2)  |
| Cl(2) | 66(3)   | 69(3)   | 120(4)  | 43(3)   | 50(3)  | 14(2)   |
| Cl(3) | 54(3)   | 256(7)  | 47(3)   | -4(3)   | 26(2)  | -27(3)  |
| Cl(4) | 141(6)  | 188(7)  | 330(11) | 170(7)  | 166(7) | 71(5)   |
| P(1)  | 73(3)   | 50(2)   | 75(3)   | -13(2)  | 43(3)  | -19(2)  |
| P(2)  | 60(2)   | 54(2)   | 39(2)   | -2(2)   | 32(2)  | -10(2)  |
| P(3)  | 67(3)   | 56(2)   | 40(2)   | -12(2)  | 32(2)  | 0(2)    |
| P(4)  | 54(2)   | 63(2)   | 56(2)   | -1(2)   | 26(2)  | 4(2)    |
| P(5)  | 38(2)   | 74(3)   | 42(2)   | -8(2)   | 13(2)  | -5(2)   |

---
